# Supplementary material for: Femtosecond-Pulsed Plasmonic Nanotweezers
Source: PubMed Central journal article supplement — Sci Rep. 2012 Sep 17;2:660. doi: 10.1038/srep00660 (PMC3443815; doi:10.1038/srep00660), 2012-09-17
Supplement: srep00660-s1.pdf [file srep00660-s1.pdf]

# Femtosecond-Pulsed Plasmonic Nanotweezers

Brian J. Roxworthy<sup>†</sup> and Kimani C. Toussaint, Jr.<sup>\*,‡,¶</sup>

*Department of Electrical and Computer Engineering, University of Illinois at Urbana-Champaign, Urbana, Illinois 61801, USA., and Department of Mechanical Science and Engineering, University of Illinois at Urbana-Champaign, Urbana, Illinois 61801, USA.*

E-mail: ktoussai@illinois.edu

## **Supplementary Video S1: Fluorescence Enhancement**

This video shows a trapped 1.2- $\mu\text{m}$  diameter fluorescent polystyrene sphere in the inverted orientation. The sphere is initially placed off the array and the white-light illumination is switched off to show a dim two-photon fluorescence signal from the trapped sphere. The particle is subsequently moved onto the 425 x 425 array and a dramatic increase in the fluorescence signal is evident along with a reduction in the Brownian motion of the particle.

## **Supplementary Video S2: 300-nm Polystyrene Sphere Trapping**

This video depicts the trapping of a single 300-nm polystyrene sphere using 65  $\mu\text{W}$  of incident laser power. The video depicts particle behavior that is characteristic of trapping: (1) 0-8 seconds – particles are seen to “jump” into the focal volume, which is located just above the central tick on the 5- $\mu\text{m}$  scalebar, and are held there for significant periods of time (2) 8-16 seconds – tweezing, or manipulation, of the particles across the BNAs is performed until the stage motion

---

\*To whom correspondence should be addressed

<sup>†</sup>Department of Electrical and Computer Engineering, University of Illinois at Urbana-Champaign, Urbana, Illinois 61801, USA.

<sup>‡</sup>Department of Mechanical Science and Engineering, University of Illinois at Urbana-Champaign, Urbana, Illinois 61801, USA.

<sup>¶</sup>Affiliate in the Department of Electrical and Computer Engineering, and Bioengineering

becomes too fast, at which point the particle is ejected from the trap (3)  $\sim$  23 seconds – a new particle enters the trap and undergoes suppressed Brownian motion at the trap site, and (4) 35-45 seconds – the shutter on the microscope is closed, causing the particle to undergo significant Brownian motion, and re-opened, causing the particle to jump back to the trap site and remain fixed, i.e., the particle is trapped.

### **Supplementary Video S3: 300-nm Polystyrene Sphere Cluster Trapping**

This video is a darkfield image of several 300-nm diameter fluorescent polystyrene spheres trapped using an input power of 50  $\mu$ W. The trapped particles are located near the central hash mark on the 5  $\mu$ m scale bar. Approximately 2/3 through the video, the group of particles is translated across the BNA surface so as to demonstrate particle tweezing.

### **Supplementary Video S4: 80-nm Ag Nanoparticle Trapping**

This video demonstrates the ability of the femtosecond nanotweezers to trap 80-nm Ag nanoparticles. The particle is initially undergoing significant Brownian motion, owing to its small size, and is suddenly pulled into the trap and held for a significant period of time. Trapping is performed using 50  $\mu$ W of input power.
